# Supplementary material
Source: PubMed Central journal article supplement (PMC4950988)

## SUPPLEMENTAL FIGURE LEGEND

**Figure S1. Expression of insulin and insulin receptors during development.** (A-B) real-time PCR analysis of *insulin a (insa)*, *insulin receptor a (insra)* and *insulin receptor b (insrb)* in embryos.  $n=3$  for each time point. Inset graph shows magnified detail of circled region. (C-D) fluorescent *in situ* hybridization indicating the expression of *insra + insrb* (red) in pancreatic tissues, including the islet  $\beta$  (*ins:CFP-NTR* in C, green) and  $\alpha$  cells (*gcga:GFP* in D, green).

**Figure S2. Insulin signaling blockade via *dnIRS2-GFP* mis-expression and drug treatments.** (A) Peptide sequence of *dnIRS2-GFP* transgene showing pleckstrin homology (PH), phosphotyrosine binding (PTB) and GFP domains. (B) Control and *dnIRS2-GFP* mRNA-injected embryos at 24 hours post fertilization (hpf). (C,D) *In situ* hybridization showing *pdx1* expression in control (C) and *dnIRS2-GFP* mRNA-injected (D) embryos. *pdx1* expression is expanded with insulin signaling blockade. (E,F) Confocal projections of 30 hpf *Tg(ins:CFP-NTR)* pancreatic islets treated with DMSO as a vehicle control (E) or 1 $\mu$ M wortmannin (F). (G) Quantification of  $\beta$  cells in DMSO-treated control ( $n=10$ ) and 100  $\mu$ M U0126-treated ( $n=9$ ) islets at 32 hpf. No change in  $\beta$  cell number was observed with U0126-mediated MAPK inhibition. Student's t-test was used to determine significance in G.

**Figure S3. Pancreatic  $\beta$  cell mass normalizes to wild type levels at 96 hpf after continual induction of *HOT:dnIRS2*.** (A-B'') Merged and single channel confocal projections of 96 hpf *HOT:dnIRS2 Cre-* control (A-A'') and *HOT:dnIRS2* (B-B'') islets after heat shock at 10 hpf, 24 hpf, 28 hpf, 32 hpf, 36 hpf, 48 hpf, 56 hpf, 72 hpf and 80 hpf. Ubiquitous induction of *dnIRS2-GFP* occurs only in the *Cre+* embryos. (C) Quantification of  $\beta$  cells in 96 hpf *HOT:dnIRS2 Cre-* control ( $n=12$ ) and *HOT:dnIRS2* ( $n=10$ ) islets;  $\beta$  cell mass is indistinguishable between the two conditions. Student's t-test was used to determine significance in C.

**Figure S4. Knockdown of insulin via *insulin-a* morpholino (*insaMO*).** (A) Diagram illustrating *insa* pre-mRNA structure in wild type and *insaMO*-injected cells. *insaMO* targets the exon 2-intron 2 boundary of *preproinsulin-a* mRNA and generates two nonsense alternative splicing products. Primers complementary to exon 1 and exon 3 amplify the differentially spliced cDNA products. (B) Agarose gel showing PCR amplified *insa cDNA* products; mRNA was extracted from control and *insaMO*-injected embryos at 2 days post fertilization (dpf). Note that

a single PCR product with size of 420 bp was detected in control embryos but two aberrant PCR products—520 and 360 bp—were detected in *insaMO*-injected embryos.  $\beta$  actin was used as internal control. (C) The PCR products in control and *insaMO*-injected embryos were extracted, cloned into pJet vector, and sequenced. *insaMO*-injected embryos showed two aberrant splice products: Product 1 included intronic sequence; Product 2 showed partial deletion of exon 2. (D) Predicted peptide sequence of control and two aberrant splice products. (E) No overt gross embryonic phenotypes resulted from injection of increasing doses of *insaMO* ranging from 2 ng to 8 ng.

**Figure S5. Sustained absence of Insulin protein by *insaMO* at 72 and 96 hpf.** Merged and single channel confocal images of 72 hpf (A-B'') and of 96 hpf (C-D'') *Tg(ins:CFP-NTR)* control (A-A'';C-C'') and *insaMO*-injected (B-B'';D-D'') islets stained for CFP ( $\beta$  cells, green), insulin (red) and glucagon (white). Insulin protein was undetectable in  $\beta$  cells at both stages.

**Figure S6. Co-injection of *insa* mRNA rescues the expansion of  $\beta$  cells in *insaMO*-injected islets.** (A-C') Merged and single channel confocal projection of 24 hpf *Tg(ins:CFP-NTR)* control (A,A'), *insaMO*-injected (B,B'), and *insaMO* + *insa* mRNA-injected (C,C') islets immunostained for CFP ( $\beta$  cells, green), Pdx1 (red), and DNA (blue). (D) Quantification of  $\beta$  cells in control, *insaMO*-injected, and *insaMO* + *insa* mRNA-injected islets. The expansion of  $\beta$  cell mass observed in *insaMO*-injected islets is rescued when *insa* mRNA is co-injected.

**Figure S7. Knockdown of *insb* results in severe developmental defects.** (A) Diagram illustrating *insb* pre-mRNA structure in wild type and *insbMO*-injected cells. *insbMO* targets the exon 4-intron 4 boundary of *preproinsulin-b* mRNA and promotes the deletion of exon 4. Primers complementary to exon 3 and exon 5 amplify the differentially spliced cDNA products. (B) Agarose gel showing amplified *insb* PCR product from 2 dpf control and *insbMO*-injected embryos. Note that a PCR product with a size of 427 bp was detected in control embryos (arrowhead) but not *insbMO* injected embryos. A weak product of 210 bp can be detected in *insbMO*-injected embryos (arrow).  $\beta$  actin was used as an internal control. (C) Dose dependent phenotypes at 48 hpf after *insbMO* injection. Arrow indicates head defect first observed at 2 ng *insbMO* dose. (D,E) RT-PCR analysis of cDNA in 30 hpf *insbMO*-injected (D) and *insaMO*-injected (E) embryos. Neither *insbMO* nor *insaMO* affected the splicing or expression of the mRNA of the respective paralog. (F-G') Merged and single channel confocal planes of 24 hpf

control (F,F') and *insbMO*-injected (G,G') islets of *Tg(ins:CFP-NTR)* embryos stained for CFP ( $\beta$  cells, green) and insulin (red). (H) Quantification of *ins:CFP-NTR*<sup>+</sup>  $\beta$  cells in 24 hpf control ( $n=5$ ) and *insbMO*-injected embryos ( $n=6$ ). Student's t-test was used to determine significance in H.

**Figure S8. Treatment of PI3K inhibitor wortmannin increases  $\beta$  cell differentiation from ventral endoderm.** (A-B'') Merged and single channel confocal planes of 30 hpf control (A-A'') and 1  $\mu$ M wortmannin-treated (B-B'') islets zygotically-injected with H2B-RFP mRNA and stained with CFP ( $\beta$  cells, green). It is noted that majority of control  $\beta$  cells were H2B-RFP-positive but significant portion of H2B-RFP-negative  $\beta$  cells (yellow arrows) were detected in wortmannin-treated embryos. (C) Quantification of DBCs (H2B-RFP-positive) and VBCs (H2B-RFP-negative) in 30 hpf DMSO-treated control ( $n=12$ ) and 1 $\mu$ M wortmannin treated embryos ( $n=15$ ). One-way ANOVA was used in C for statistical analysis.

**Figure S9. *insaMO* does not increase  $\beta$  cell proliferation.** (A-B'') Merged and single channel confocal projections of 1 dpf control (A-A'';  $n=6$ ) and *insaMO*-injected (B-B'';  $n=5$ ) *Tg(ins:CFP-NTR)* islets stained with CFP ( $\beta$  cells, green), phospho-Histone H3 (red), and insulin (white). (C-D'') Merged and single channel confocal planes of 1 dpf control (C-C'';  $n=6$ ) and *insaMO*-injected (D-D'';  $n=5$ ) *Tg(ins:CFP-NTR)* islets stained with CFP ( $\beta$  cells, green), EdU (red) and Insulin (white).

**Figure S10. Insulin knockdown induces ectopic Pdx1 expression in ventral endoderm.** Merged and single channel confocal images of 24 hpf control (A-B') and *insaMO*-injected (C-D') *Tg(ins:CFP-NTR)* islets immunostained for CFP ( $\beta$  cells, green), Pdx1 (red), and DNA (blue). (A) Confocal projection and (B-B') higher power magnification confocal plane of control islet. (C) Confocal projection and (D-D') higher power magnification confocal plane of *insaMO*-injected islet. Note the formation of  $\beta$  cells from Pdx1<sup>+</sup> ventral endoderm (ve) in *insaMO*-injected embryos (yellow arrow). Abbreviation: pi, principal islet.

**Figure S11. Insulin knockdown disrupts islet structure and  $\alpha$  cell development.** Confocal projections of control and *insaMO*-injected islets from *Tg(ins:CFP-NTR)* embryos immunostained for CFP ( $\beta$  cells, green), Glucagon (red), and DNA (blue) at 54 hpf (A,D), 80 hpf

(B,E) and 100 hpf (C,F). Islets in *insaMO*-injected embryos are dysmorphic with insulin-positive  $\beta$  cells aberrantly surrounding a diminished number of Glucagon-positive  $\alpha$  cells.

**Figure S12. Insulin knockdown has no effect on  $\delta$  cell number or total endocrine cell number.** (A,B) Confocal projections of 3 dpf control (A) and *insaMO*-injected (B) islets immunostained for Insulin (green), Somatostatin (red), and DNA (blue). (C) Quantification of somatostatin-positive cells in control ( $n=5$ ) and *insaMO*-injected ( $n=6$ ) embryos at 3 dpf. No significant change was evident in  $\delta$  cell mass. (D) Quantification of endocrine cells in control and *insaMO*-injected embryos from 1 dpf to 4 dpf.  $n \geq 7$  for all time points. (E-L) Confocal projections of control (E-H) and *insaMO* (I-L) islets in doubly transgenic *Tg(neurod:GFP); Tg(ins:dsRed)* embryos. Student's t-test was used in C and two way ANOVA was used in D to determine significance.

**Figure S13. *insulin* knockdown increases  $\alpha$  cell plasticity.** (A-D) Confocal planes show control (A,C) and *insaMO*-injected (B,D) *Tg(gcga:GFP)* islets at 30 hpf (A,B) and 100 hpf (C,D) immunostained for Pdx1 (red) and DNA (blue). An increased number of double positive Gcg+ Pdx1+ cells are indicated by arrows. (E) Quantification of *gcga:GFP*+ (white), *gcga:GFP*+ Pdx1+ (gray), and Pdx1+ (red) cells in control and *insaMO*-injected embryos at 30 hpf and 100 hpf.  $n \geq 7$  for all time points. (F-G''') Confocal planes showing  $\beta$  cell regeneration after MTZ treatment in control (F-F''') and *insaMO*-injected (G-G''') triply transgenic *Tg(ins:Flag-NTR); Tg(hs:loxp-mcherry-loxp-H2BGFP); Tg(gcga:cre)<sup>s962</sup>* islets immunostained for Insulin (white), GFP (green), Glucagon (red), and DNA (blue). Red arrows indicate H2B-GFP+ Glucagon+ cells, which have retained  $\alpha$  cell character, while white arrows indicate H2B-GFP+ Glucagon- cells, which have lost  $\alpha$  cell character during  $\beta$  cell regeneration. (H) Percentage of the H2B-GFP-positive cell population that is Gcg-negative in control ( $n=7$ ) and *insaMO*-injected regenerating ( $n=13$ ) islets. More lineage-labeled  $\alpha$  cells lost glucagon expression in *insaMO*-injected islets than in control, suggesting increased plasticity. Student's t-test was used in H to determine significance.

**Figure S14. Transplanted endoderm-committed blastomeres (ECBs) can differentiate into pancreatic endocrine cells in  $\beta$  cell ablated host larvae.** (A-C') Merged and single channel confocal planes of chimeras composed of *Tg(sox17:GFP)* ECBs transplanted into  $\beta$  cell-ablated host larvae, shown at 2 days post transplantation (dpt)/6 dpf. Chimeras were immunostained for

GFP (green), Insulin (red), Glucagon (white), and DAPI (blue). (A,B) Control donor ECBs, and (C) *dnIRS2-GFP* mRNA-injected ECBs. With insulin signaling blockade, insulin+  $\beta$  cell generation was increased in donor ECBs, while Glucagon+  $\alpha$  cell generation was decreased.

**Figure S15. Transplantation of ECBs influences host  $\beta$  cell regeneration in the principal islet.** (A-C) Confocal projections of host-derived regenerating principal islets within chimeras at 2 days post ablation. Chimera composition was: (A-A'') Sham donor control without transplantation (B-B''); control donor *Tg(sox17:GFP)* ECBs; and (C-C'') *dnIRS2-GFP* mRNA-injected donor *Tg(sox17:GFP)* ECBs. Chimeras were immunostained for Insulin (red), Glucagon (white), and DNA (blue). Regeneration of  $\beta$  cells was increased in the principal islet of the host when insulin signaling was blocked by *dnIRS2-GFP* in the transplanted ECBs.

Fig S1.  
Ye et al., DBIO-15-220

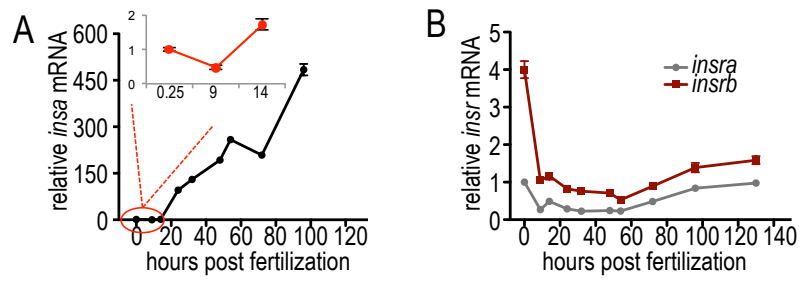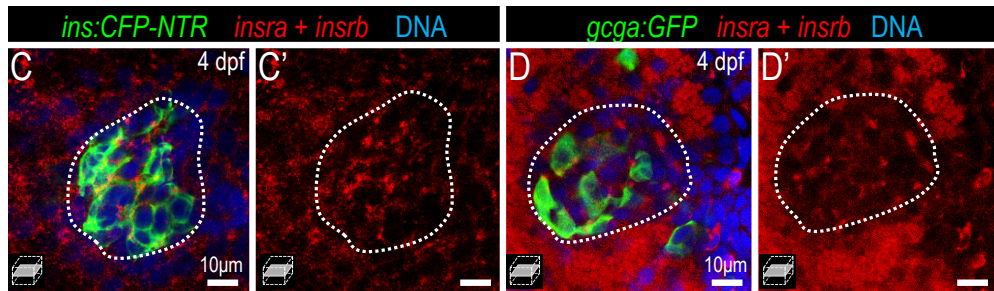

Fig S2.  
Ye et al., DBIO-15-220

**A dnIRS2-EGFP** PH domain PTB domain EGFP

```

MASPPPTGGQLISDMTVKNNNHVKKCGYLRKQKHGHRFFVLREPS
DGSRARLEYESEKKWKNKSAKRVIPLDSCLNINKRADAKHKHLI
ALYTKDEYFAVATENEQEQEDWFTVLTDLMNEGKVSDGSASNSASS
LVGFDEANYGVITPVTAAYKEVWQVNLKSKGLGQSRNLTVVYRLCL
SSRTISFVKLNTENASVILQLMNIRRCGHSDSFFFIEVGRSASIGP
GELWMOADDSVVAQNIHETILEAMKAMKEMSEFRPRSKSQSSGTNP
ISVPTRRHFNNLPPSQTGLPRRSRTDSMAAMVSKGEELFTGVVPIIL
VELDGDVNGHKFSVSGEGEGDATYGKLTLLKFICTTGKLPVPWPTLV
TTLTYGVQCFSRYPDHMKQHDFFKSAMPEGYVQERTIFFKDDGNYK
TRAEVKFEGDTLVNRIELKGIDFKEDGNILGHKLEYNYNSHNVYIM
ADKQKNGIKVNFKIRHNIEDGSVQLADHYQONTPIGDGPVLLPDNH
YLSTQSALS KDPNEKRDMVLLFVTAAGITLGMDELYK*
    
```

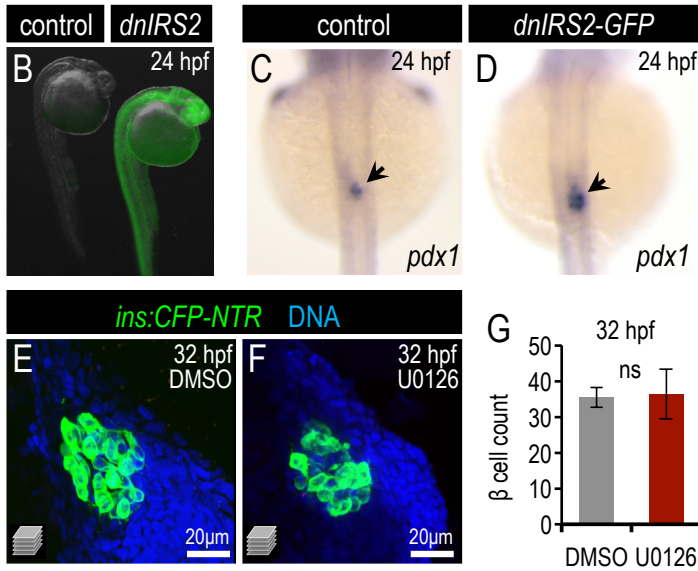

Fig S3.  
Ye et al., DBIO-15-220

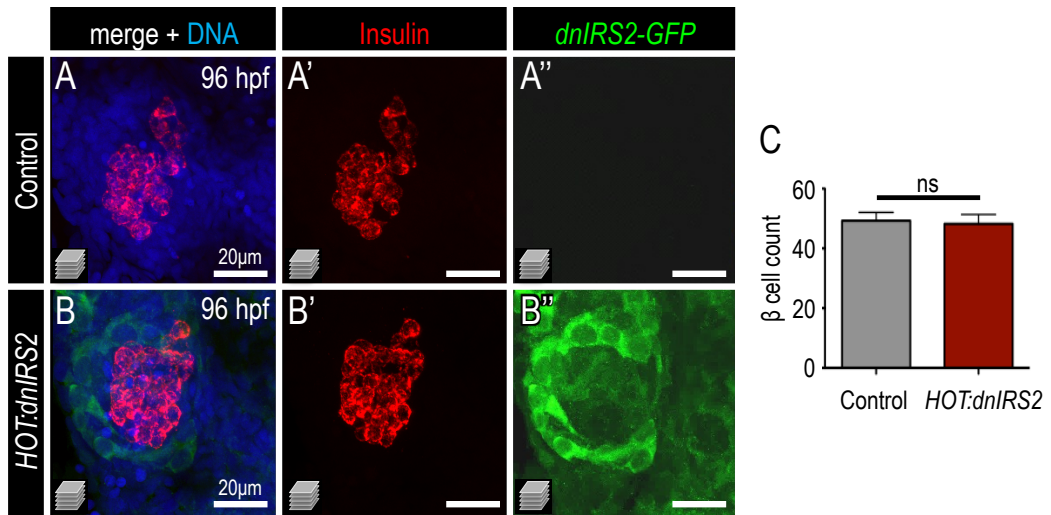



Fig S4.  
Ye et al., DBIO-15-220

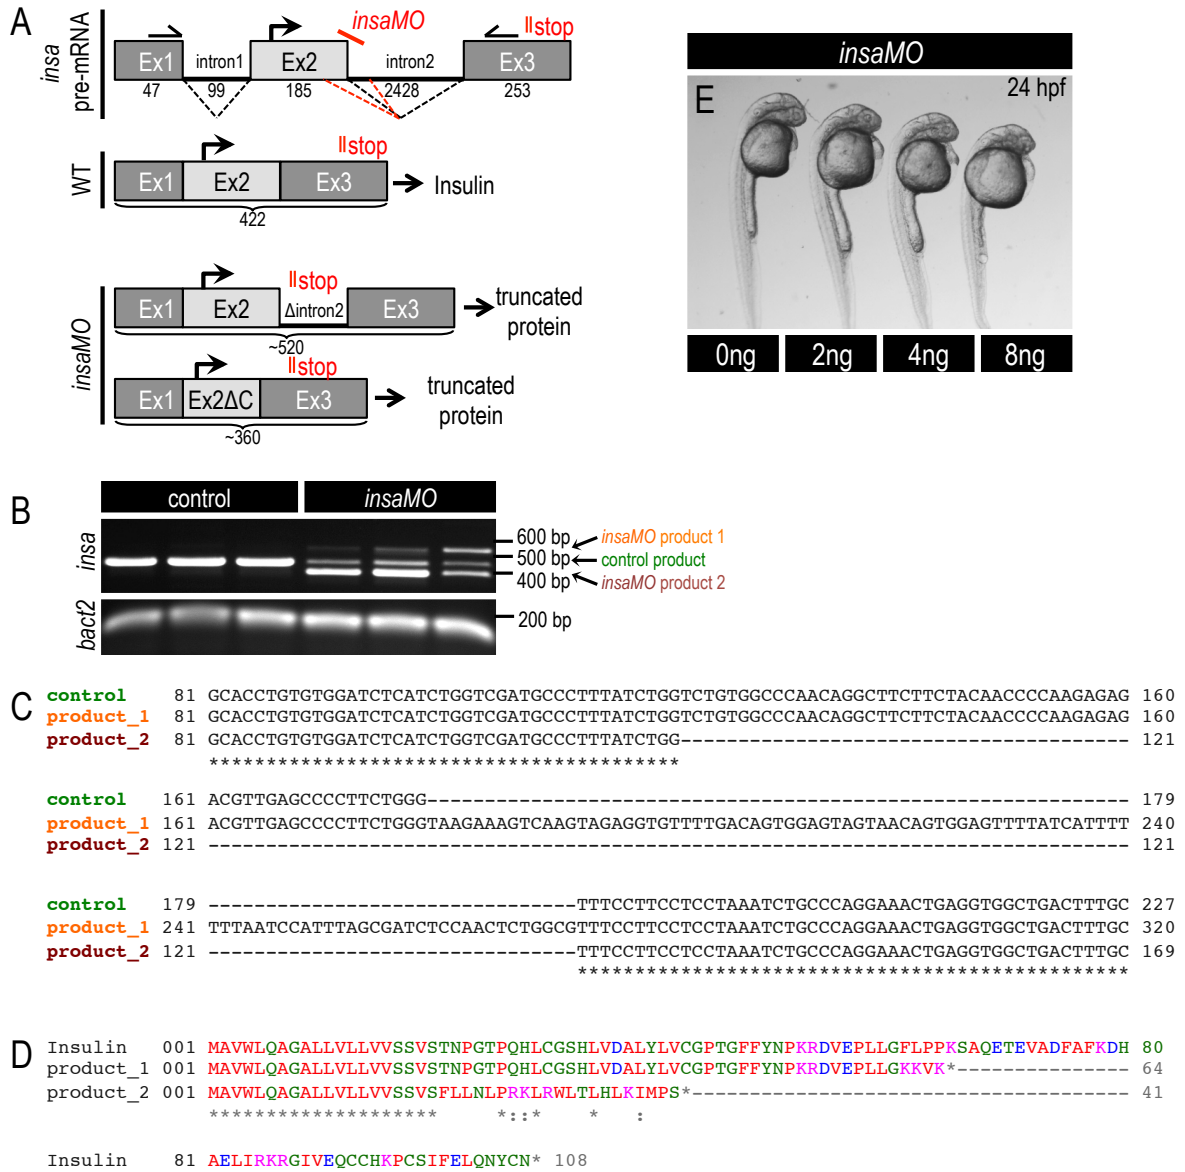

Fig S5.  
Ye et al., DBIO-15-220

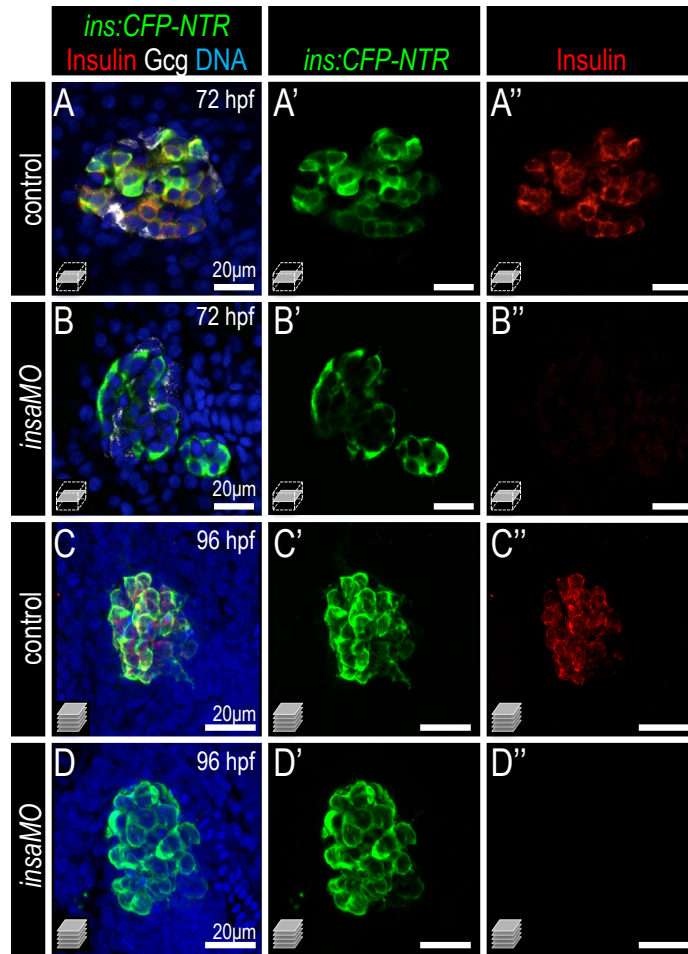

Fig S6.  
Ye et al., DBIO-15-220

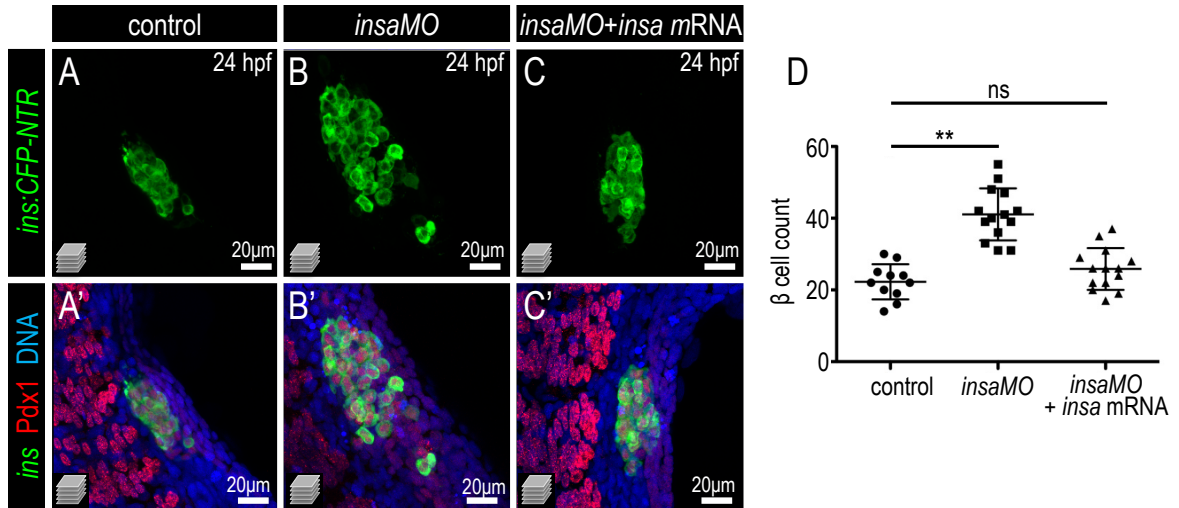

Fig S7.  
Ye et al., DBIO-15-220

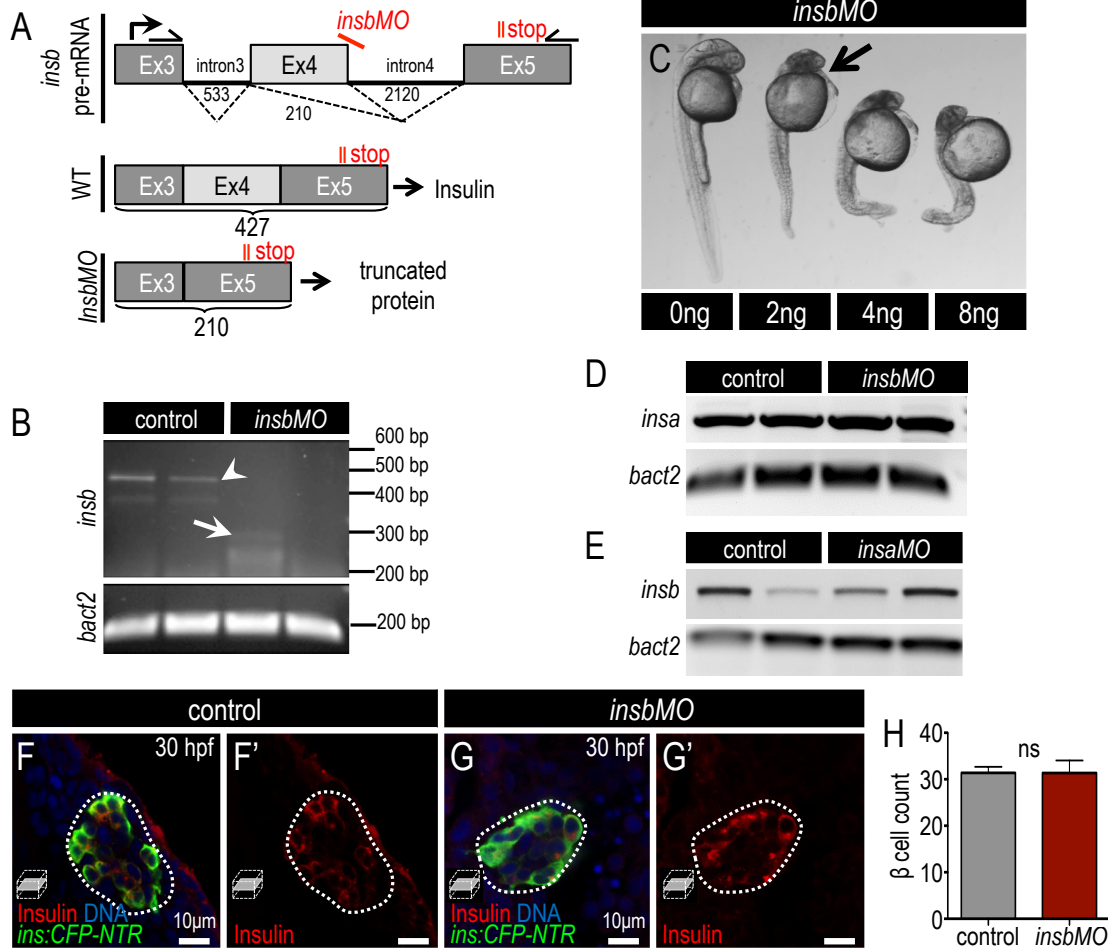

Fig S8.  
Ye et al., DBIO-15-220

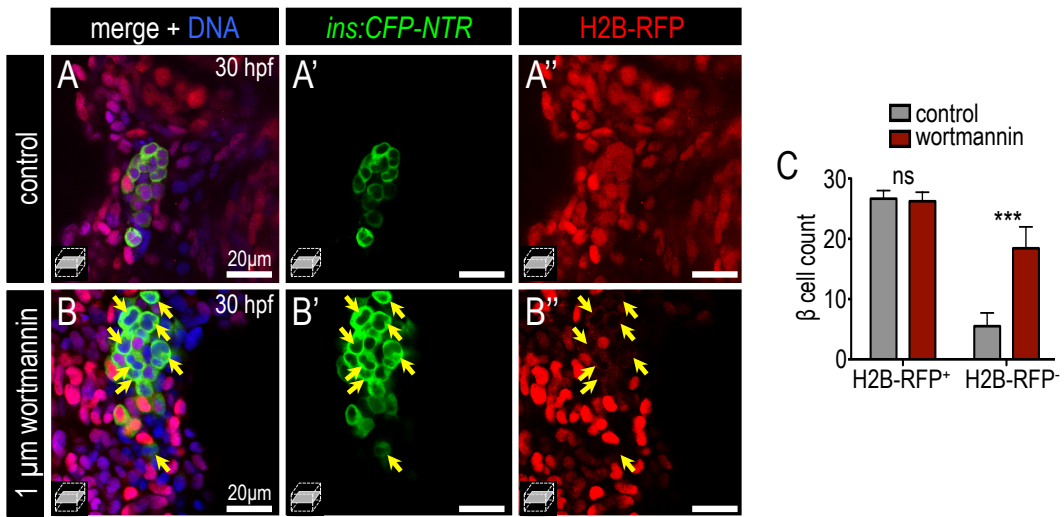

Fig S9.  
Ye et al., DBIO-15-220

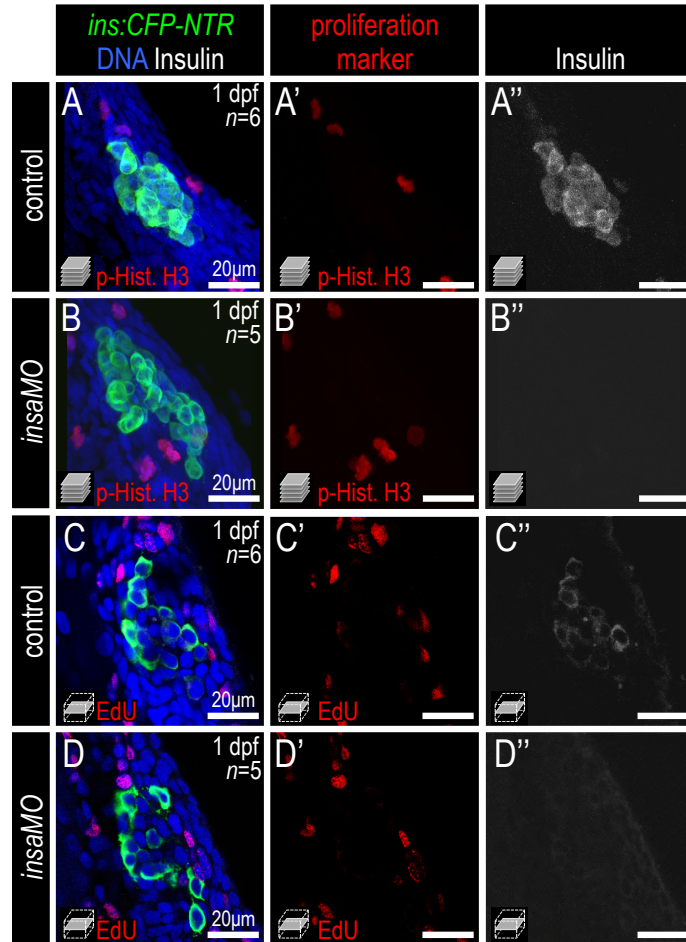

Fig S10.  
Ye et al., DBIO-15-220

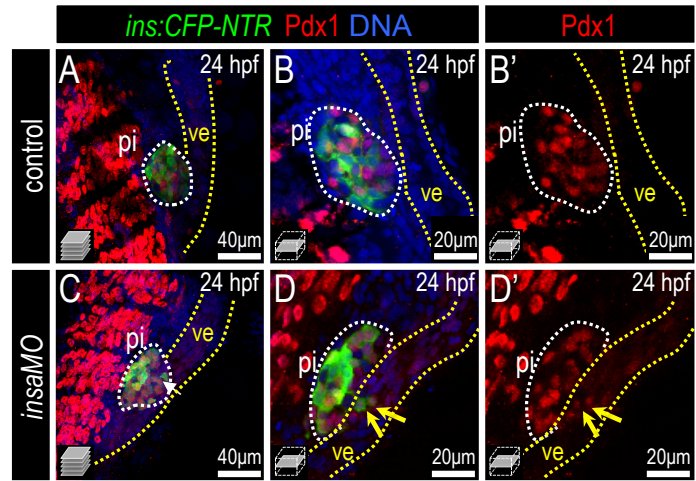

Fig S11.  
Ye et al., DBIO-15-220

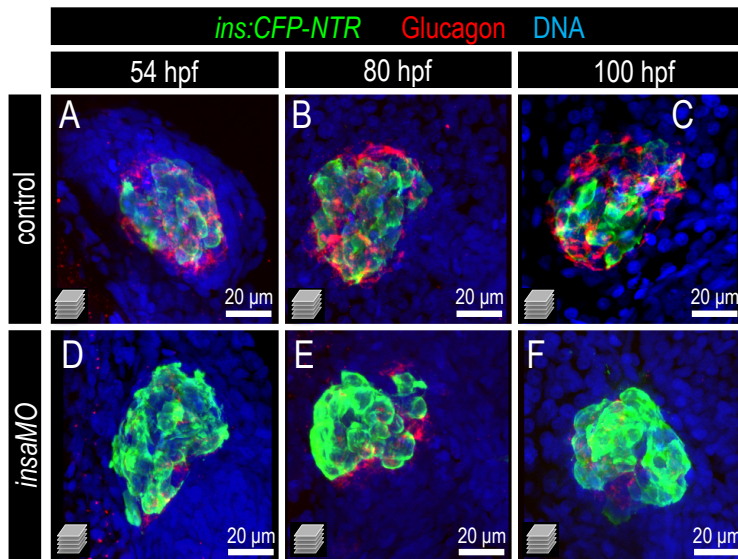



Fig S12.  
Ye et al., DBIO-15-220

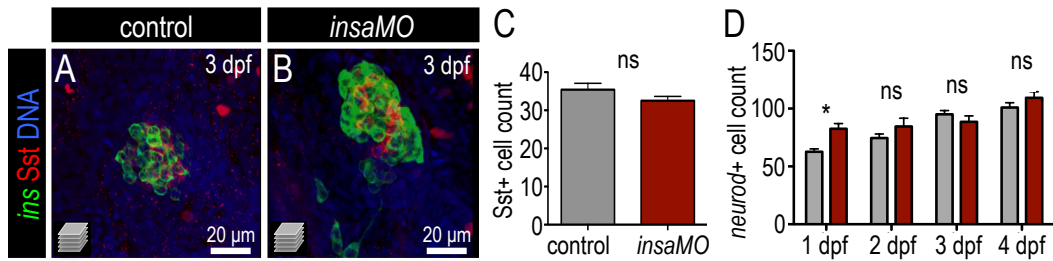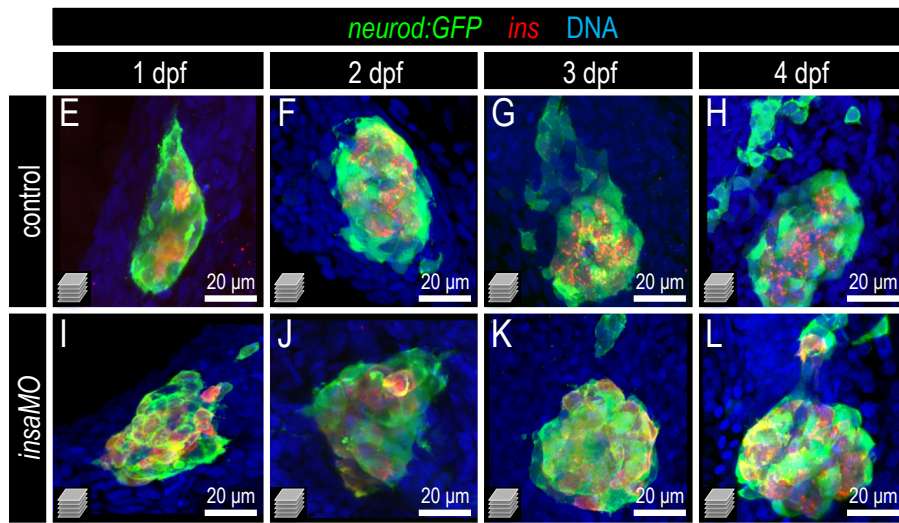

Fig S13.  
Ye et al., DBIO-15-220

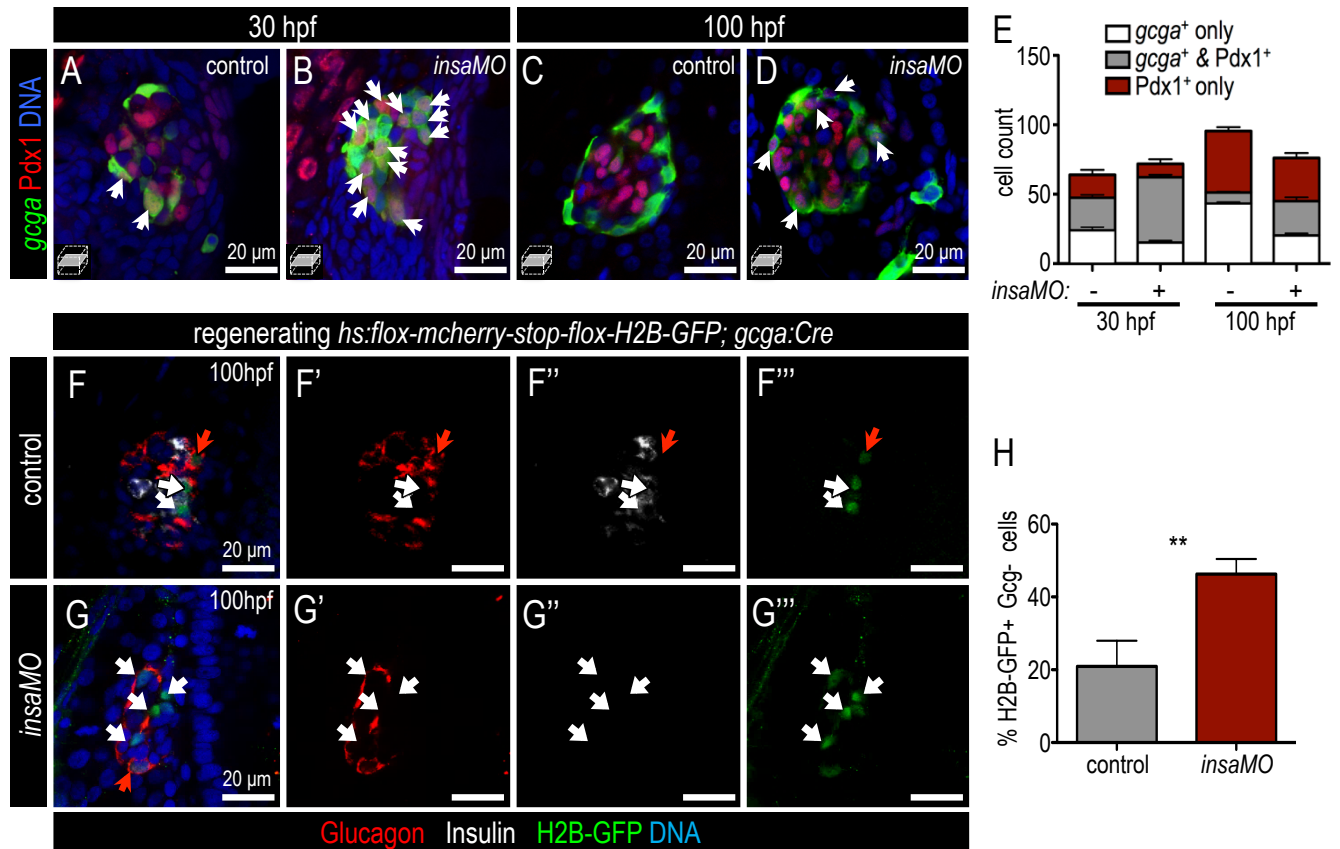

Fig S14.  
Ye et al., DBIO-15-220

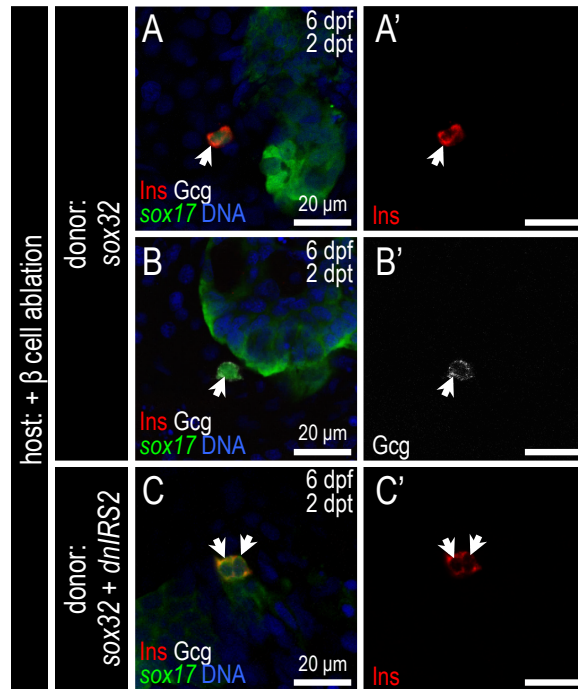

Fig S15.  
Ye et al., DBIO-15-220

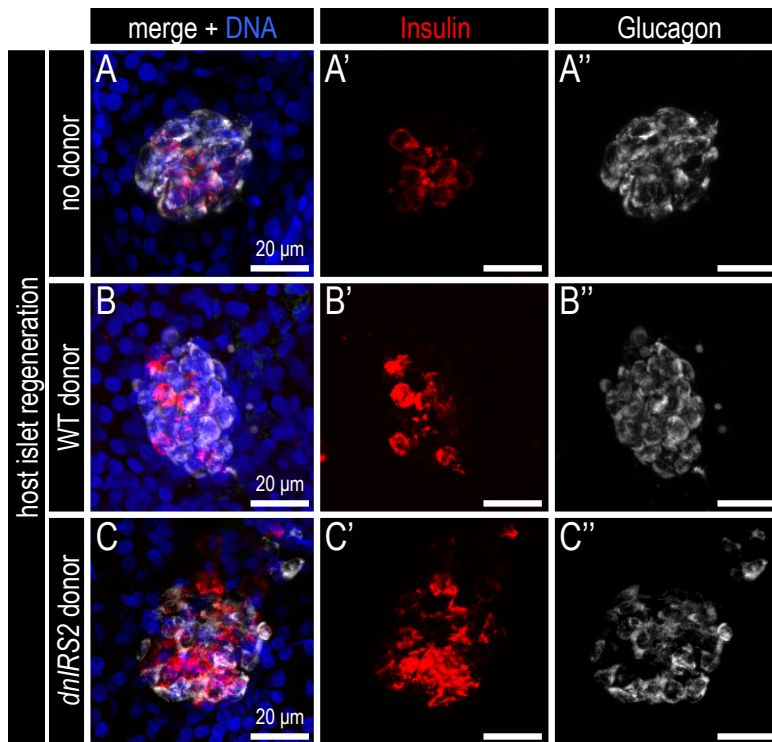

Supplement: NIHMS771017-supplement-Ye_et_al___supplemental.pdf [file NIHMS771017-supplement-Ye_et_al___supplemental.pdf]
